# Supplementary material for: Modulating the electro-optical properties of doped C3N monolayers and graphene bilayers via mechanical strain and pressure
Source: Royal Society of Chemistry journal article supplement (doi:10.1039/d0nj03340e), 2020-01-01
Supplement: d0nj03340e1.pdf [file d0nj03340e1.pdf]

Supporting Information (SI)/ **Modulating the electro-optical  
properties of doped C3N monolayer and graphene  
bilayer via mechanical strain and pressure**

A. Bafekry <sup>a,b\*</sup> , Ch. Nguyen <sup>c</sup> , M. M. Obeid <sup>d</sup> , Mitra Ghergherehchi <sup>d<sup>e\*</sup></sup>

<sup>a</sup>*Department of Physics, University of Guilan, 41335-1914 Rasht, Iran.*

<sup>b</sup>*Department of Physics, University of Antwerp, Groenenborgerlaan 171, B-2020 Antwerp, Belgium.*

<sup>c</sup>*Institute of Research and Development, Duy Tan University, Da Nang 550000, Vietnam.*

<sup>d</sup>*Department of Ceramics, College of Materials Engineering, University of Babylon, 51002 Hilla, Iraq.*

<sup>d</sup>*College of Electronic and Electrical Engineering, Sungkyun kwan University, Suwon, Korea*

## Computational details for optical properties calculations

In the random phase approximation, the imaginary part of the interband dielectric permittivity is given by [1]:

$$\text{Im} \varepsilon_{\alpha\beta}(\omega) = \frac{4\pi^2 e^2}{\Omega} \lim_{q \rightarrow 0} \frac{1}{|q|^2} \sum_{c,v,k} 2w_k \delta(\varepsilon_{ck} - \varepsilon_{vk} - \omega) \times \langle u_{ck+e_\alpha q} | u_{vk} \rangle \langle u_{ck+e_\beta q} | u_{vk} \rangle^i \quad (1)$$

where  $q$  is the Bloch vector of the incident wave,  $w_k$  is the  $\mathbf{k}$ -point weight and the band indices  $c$  and  $v$  are restricted to the conduction and the valence band states, respectively. By using the

$\text{Im} \varepsilon_{\alpha\beta}(\omega)$ , one can determine the corresponding real part via the Kramers–Kronig relations:

$$\text{Re} \varepsilon_{\alpha\beta}(\omega) = 1 + \frac{2}{\pi} P \int_0^\infty \frac{\omega' \text{Im} \varepsilon_{\alpha\beta}(\omega')}{(\omega')^2 - \omega^2 + i\eta} d\omega' \quad (2)$$

where  $P$  denotes the principle value and  $\eta$  is the complex shift. By taking into account the contribution of intraband transitions for metals [1], it is obtained that:

$$\text{Im} \varepsilon_{\alpha\beta}^{[intra]}(\omega) = \frac{\Gamma \omega_{pl,\alpha\beta}^2}{\omega(\omega^2 + \Gamma^2)} \quad (3)$$

$$\text{Re} \varepsilon_{\alpha\beta}^{[intra]}(\omega) = 1 - \frac{\omega_{pl,\alpha\beta}^2}{\omega(\omega^2 + \Gamma^2)} \quad (4)$$

In these equations  $\omega_{pl}$  is the plasma frequency and  $\Gamma$  is the life time broadening:

$$\omega_{pl}^2 = \frac{n_e e^2}{\varepsilon_0 m^*} \quad (5)$$

where  $n_e$  is the number density of electrons,  $e$  is the electric charge,  $m^*$  is the effective mass of the electron. The adsorption coefficient determined as:

$$a_{\alpha\beta}(\omega) = \frac{2\omega k_{\alpha\beta}(\omega)}{c} \quad (6)$$

where  $k_{\alpha\beta}$  is imaginary part of the complex refractive index and  $c$  is the speed of light in vacuum, known as the extinction index. It is given by the following relations

\*To whom correspondence should be addressed.

$$k_{\alpha\beta}(\omega) = \sqrt{\frac{|\varepsilon_{\alpha\beta}(\omega) - \text{Re} \varepsilon_{\alpha\beta}(\omega)|}{2}} \quad (7)$$

The reflectivity is given by

$$R_{ij}(\omega) = \frac{(n-1)^2 + k^2}{(n+1)^2 + k^2} \quad (8)$$

where  $n$  and  $k$  are real and imaginary parts of the complex refractive index, which are known as the refractive index and the extinction index, respectively.

## References

- [1] F. Wooten, **Optical Properties of Solids**, Academic press (2013).

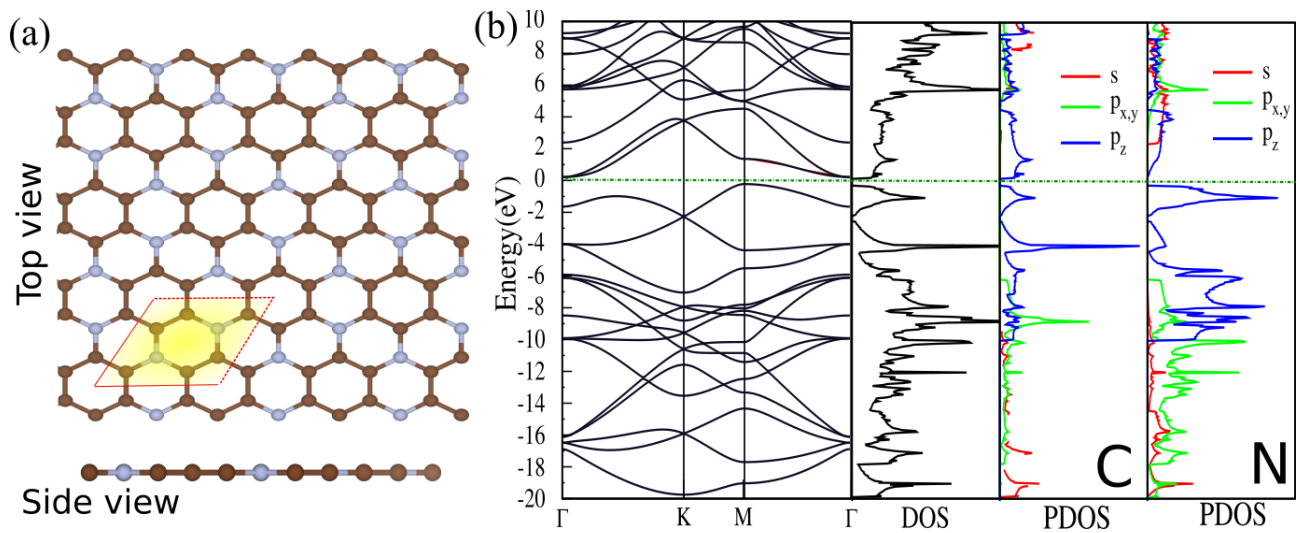

Fig. S1. (a) Atomic structure, electronic and (b) electronic band structure with corresponding density of state (DOS) and partial DOS (PDOS) of C3N monolayer. The zero of energy is at Fermi-level.

\*To whom correspondence should be addressed.

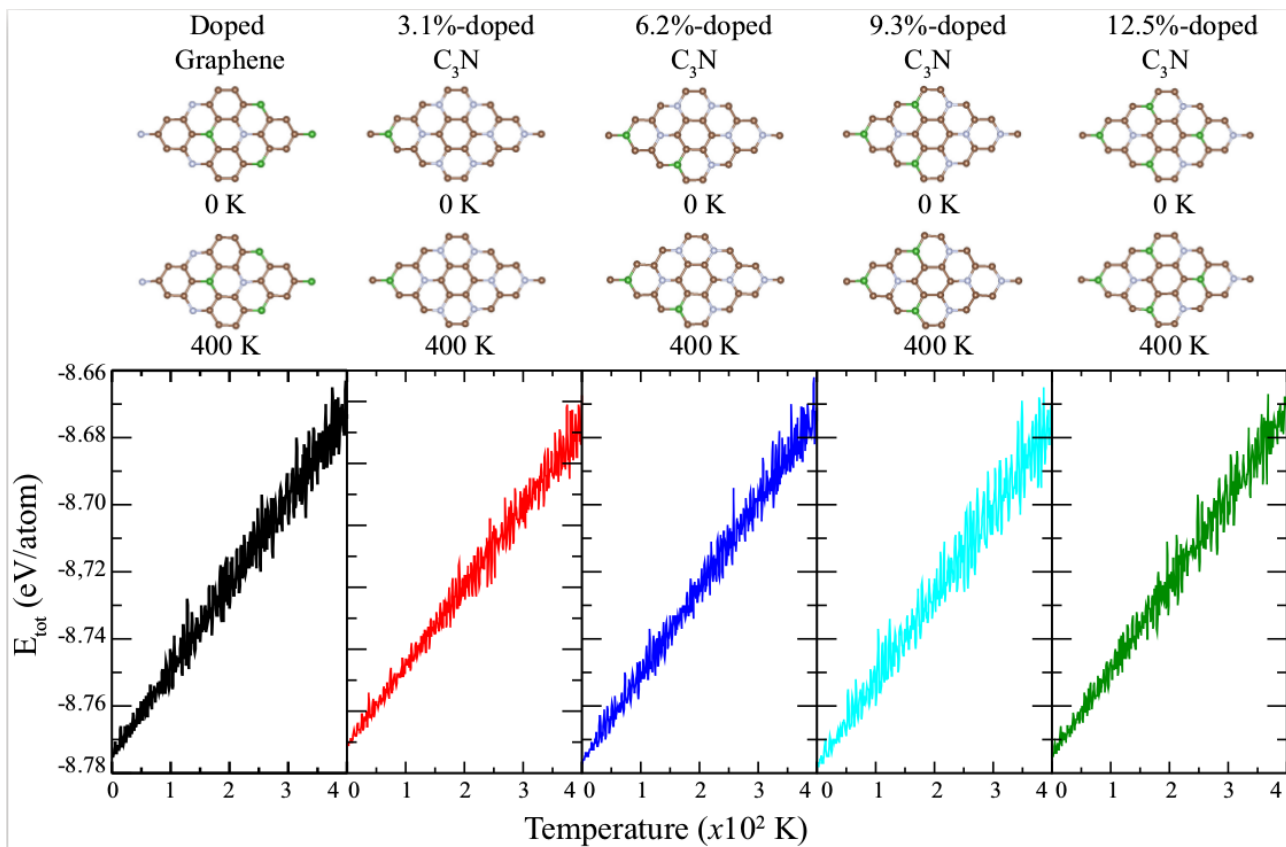

Fig. S2. The ab-initio molecular dynamics (AIMD) simulations of pristine and B-doped C<sub>3</sub>N monolayer with different concentrations.

\*To whom correspondence should be addressed.

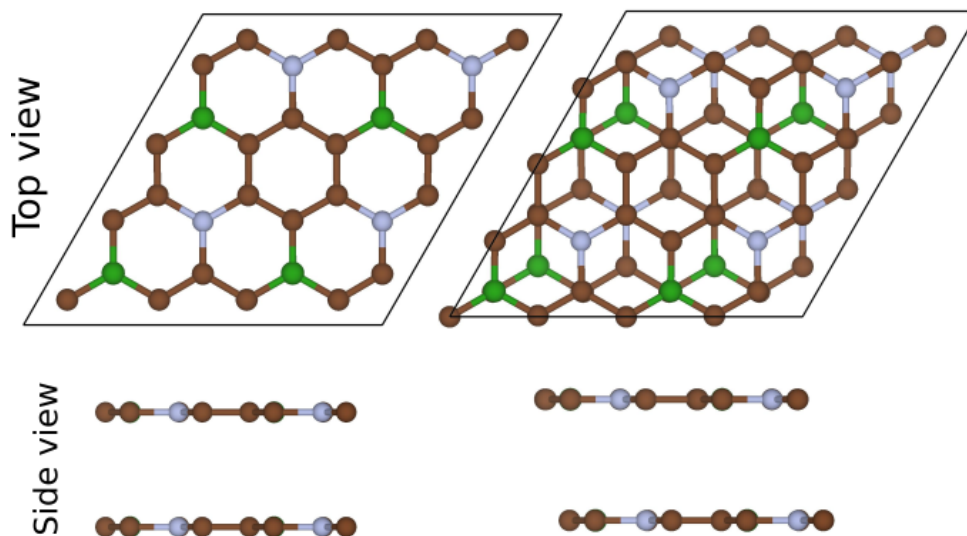

Fig. S3. Top and side views of AA (left) and AB (right) stacking arrangements of B/N-doped graphene bilayer.
